# Supplementary material for: Phase transformation of a rare-earth Anderson polyoxometalate at low temperature
Source: Royal Society of Chemistry journal article supplement (doi:10.1039/b808085b), 2008-01-01
Supplement: b808085b.pdf [file b808085b.pdf]

# Supplementary Information

## Phase transformation of a rare-earth Anderson polyoxometalate at low temperature

*Li-Zhi Zhang, Wen Gu, Zhili Dong\*, Xin Liu\* and Bing Li*

School of Materials Science and Engineering, Nanyang Technological University, Singapore 639798, Singapore and Department of Chemistry, Nankai University, Tianjin 300071, People's Republic of China

**Fig. S1** View of complex hydrogen bonds for (a) phase **1** and (b) phase **1'**.

**Fig. S2** XRD patterns of (i) the resulted samples at the first water-loss step of TGA; (ii) the resulted samples at the second water-loss step of TGA and (iii) rehydrated samples.

**Fig. S3** The comparison of calculated XRD patterns between **1** and **1'**.

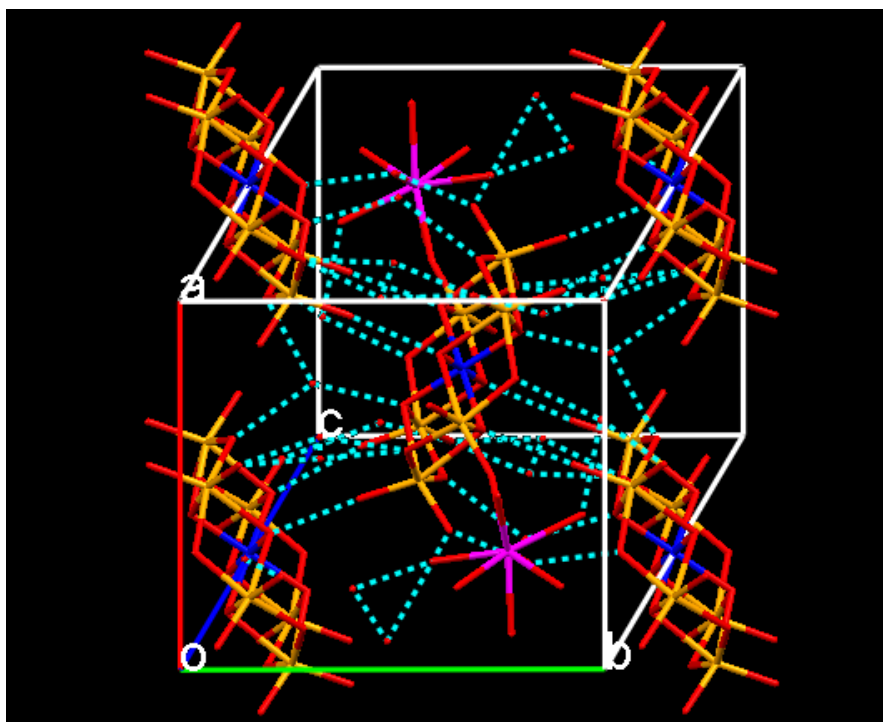

(a)

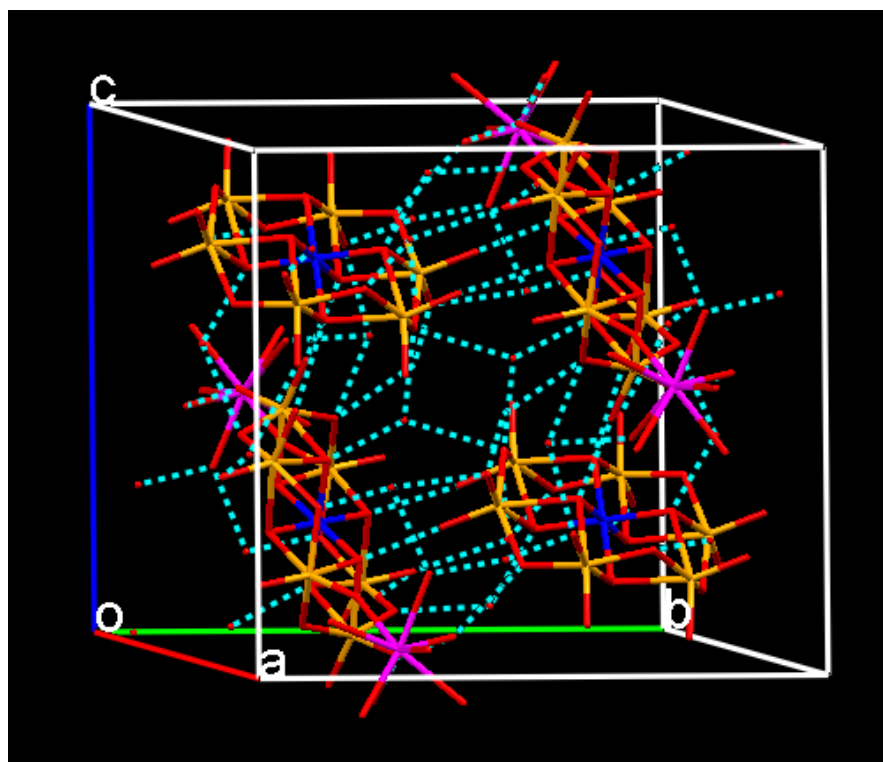

(b)

**Fig. S1** View of complex hydrogen bonds for (a) phase **1** and (b) phase **1'**.

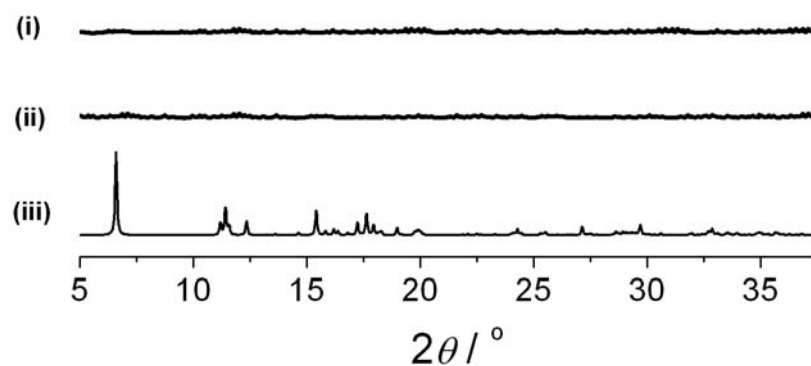

**Fig. S2** XRD patterns of (i) the resulted samples at the first water-loss step of TGA; (ii) the resulted samples at the second water-loss step of TGA and (iii) rehydrated samples.

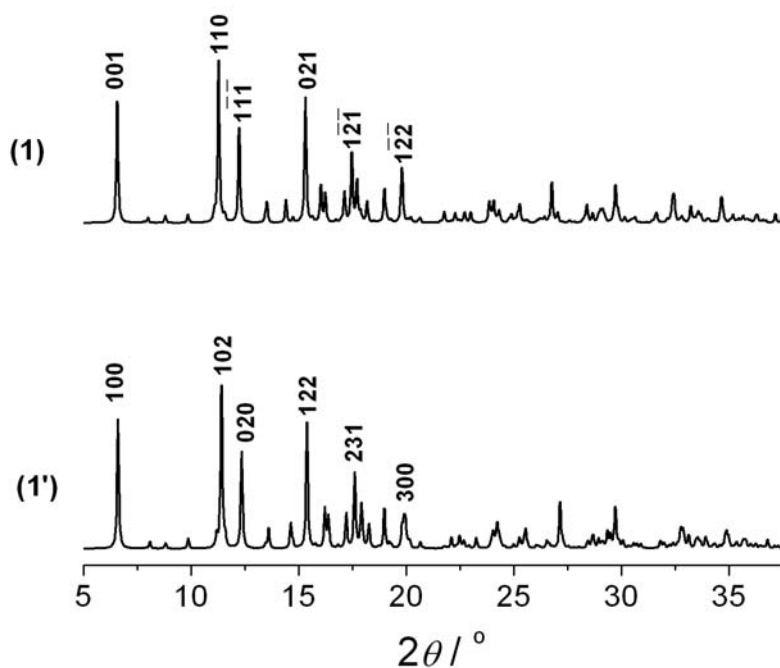

**Fig. S3** The comparison of calculated XRD patterns between **1** and **1'**.
